# Supplementary material for: Electrostatic droplets assisted in situ synthesis of superparamagnetic chitosan microparticles for magnetic-responsive controlled drug release and copper ion removal
Source: Royal Society of Chemistry journal article supplement (doi:10.1039/c3tb00467h), 2013-01-01
Supplement: c3tb00467h.pdf [file c3tb00467h.pdf]

## Supplementary Information

### **Electrostatic droplets assisted in-situ synthesis of superparamagnetic chitosan microparticles for magnetic-responsive controlled drug release and copper ion removal**

Chih-Yu Wang<sup>1</sup>, Chih-Hui Yang<sup>2\*</sup>, Keng-Shiang Huang<sup>3</sup>, Chen-Sheng Yeh<sup>4</sup>, Andrew H.-J. Wang<sup>5</sup>, Chih-Hsin Chen<sup>1,2,3</sup>

<sup>1</sup>Dept. of Biomedical Engineering, I-Shou University, Taiwan

<sup>2</sup>Dept. of Biological Science & Technology, I-Shou University, Taiwan

<sup>3</sup>The School of Chinese Medicine for Post-Baccalaureate, I-Shou University, Taiwan

<sup>4</sup>Dept. of Chemistry, National Cheng-Kung University, Taiwan

<sup>5</sup>Institute of Biological Chemistry, Academia Sinica, Taiwan

\*To whom all correspondence should be addressed

E-mail: [chyang@isu.edu.tw](mailto:chyang@isu.edu.tw)

Tel: +886-7-615-1100 ext. 7312

**Keywords:** electrostatic droplets, chitosan, controlled drug release, heavy metal removal

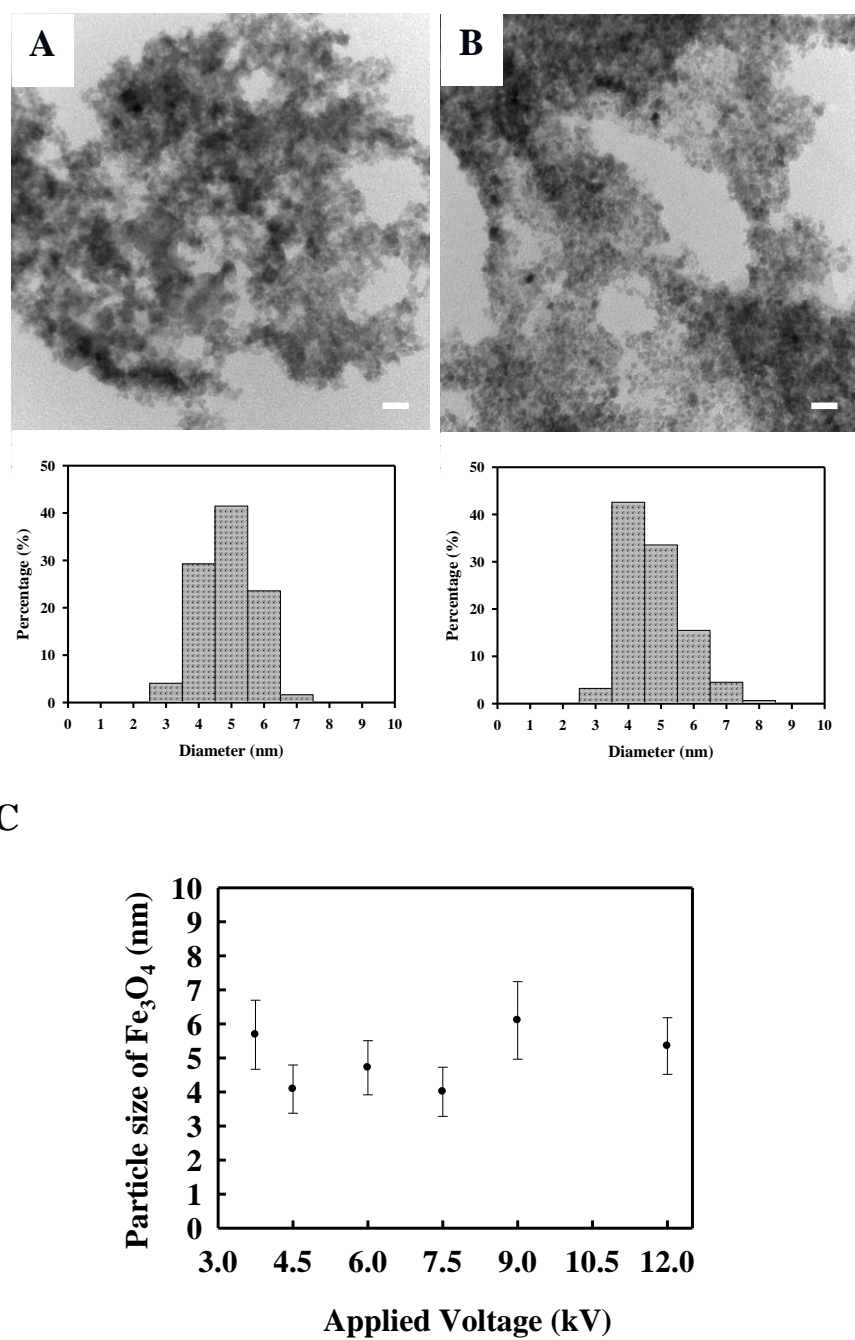

**Fig. S1** TEM images of (A) the iron oxide nanoparticles, and (B) the iron oxide nanoparticles loaded-chitosan particles synthesized under an electric field of 3.75 kV. (C) The influence between the applied voltages in the ESD process and the particle size of the iron oxide nanoparticles loaded-chitosan particles. (A, B) Scale bars are 20 nm.

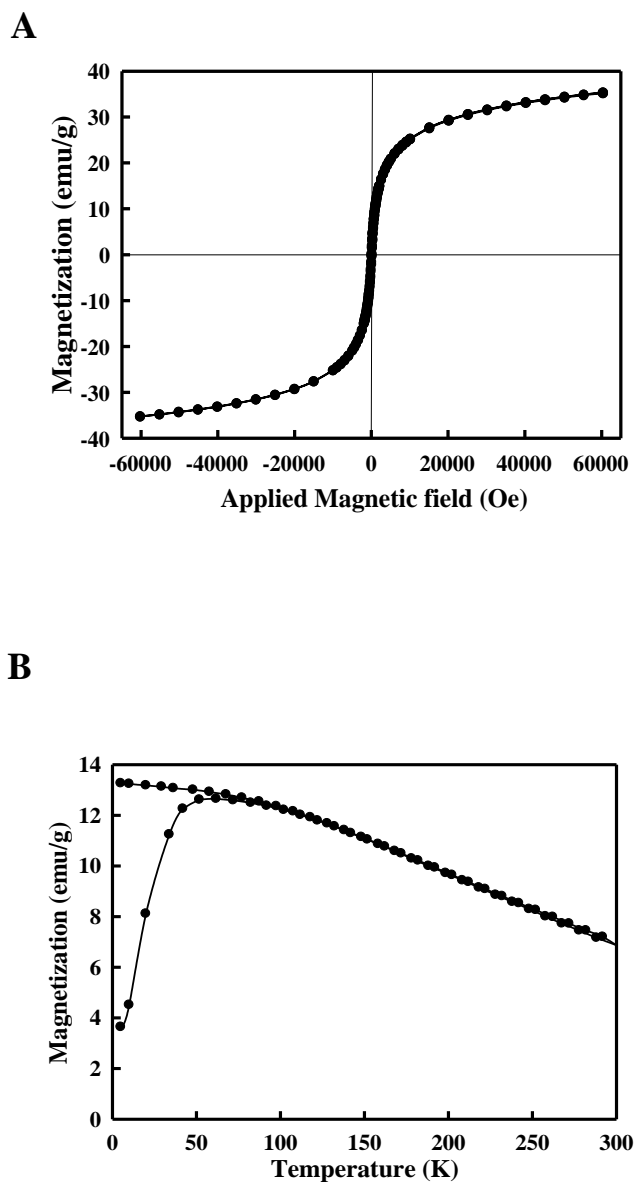

**Fig. S2** Magnetic characteristic of the  $\text{Fe}_3\text{O}_4$ -loaded chitosan particles (synthesized under an electric field of 3.75 kV). (A) Magnetization plots. (B) Temperature dependent ZFC-FC magnetization curves.

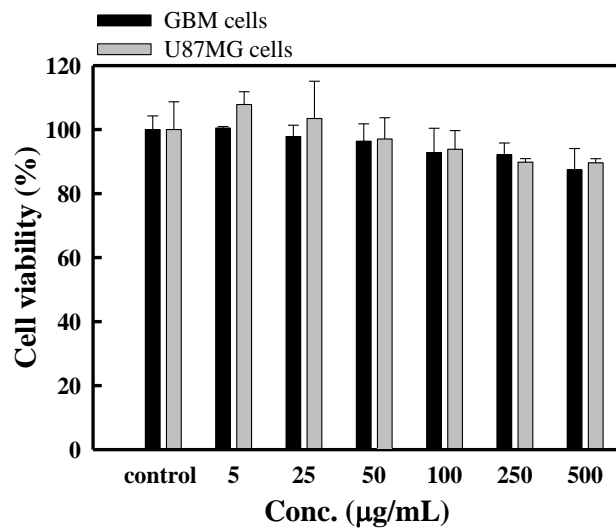

**Fig. S3** Analysis of cell viability.

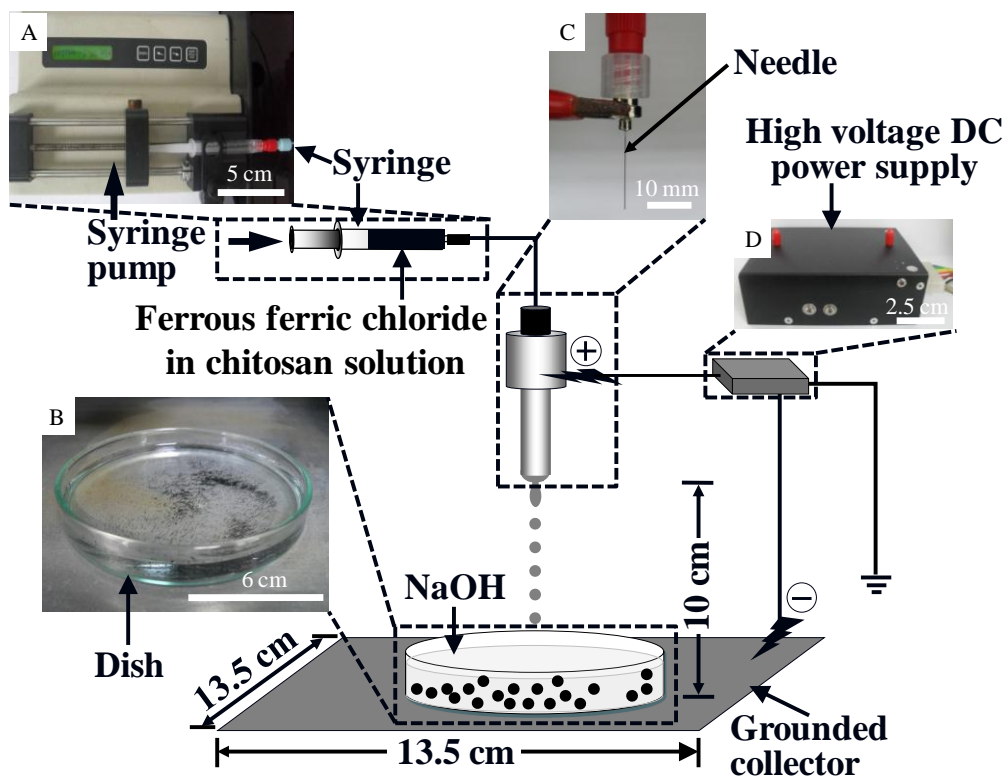

**Fig. S4** Experimental setup of the electrostatic droplet system. (A~D) Close-up views of each equipment. Scale bars: A: 5 cm; B: 6 cm; C: 10 mm; and D: 2.5 cm.
